# Supplementary material for: Thermoresponsive scaffolds fabricated using covalent organic frameworks for the selective removal of water contaminants
Source: Royal Society of Chemistry journal article supplement (doi:10.1039/d4ma00792a), 2024-01-01
Supplement: d4ma00792a1.pdf [file d4ma00792a1.pdf]

## Supporting Information

### Thermoresponsive Scaffolds Fabricated Using Covalent Organic Frameworks for the Selective Removal of Water Contaminants

Safoora Gazvineh<sup>a</sup>, Mohammad Nemati<sup>a</sup>, Siamak Beyranvand<sup>a</sup>, Sara Saki<sup>a</sup>, Kai Ludwig<sup>b</sup>, Patrick Amsalem<sup>c</sup>,  
Thorstenn Schultz<sup>c,d</sup>, Chong Cheng<sup>e</sup>, Mohsen Adeli<sup>a,b\*</sup>

<sup>a</sup>Faculty of Science, Department of Chemistry, Lorestan University, Khorramabad, Iran

<sup>b</sup>Forschungszentrum für Elektronenmikroskopie and Core Facility BioSupraMol, Institut für Chemie und Biochemie, Freie Universität Berlin, Fabeckstr. 36a, 14195 Berlin, Germany

<sup>c</sup>Institut für Physik, Humboldt-Universität zu Berlin, Newtonstr. 15, 12489 Berlin, Germany

<sup>d</sup>Helmholtz-Zentrum Berlin für Materialien und Energie GmbH, Berlin 14109, Germany

<sup>e</sup>College of Polymer Science and Engineering, State Key Laboratory of Polymer Materials Engineering, Sichuan University, Chengdu, 610065, China

Corresponding author: [adeli.m@lu.ac.ir](mailto:adeli.m@lu.ac.ir) (Mohsen Adeli), [m.adel@fu-berlin.de](mailto:m.adel@fu-berlin.de) (Mohsen Adeli)

|                                                                                                                                                                                                                                                                  |   |
|------------------------------------------------------------------------------------------------------------------------------------------------------------------------------------------------------------------------------------------------------------------|---|
| <b>Experimental</b> .....                                                                                                                                                                                                                                        | 3 |
| Materials and methods.....                                                                                                                                                                                                                                       | 3 |
| Pseudo second order kinetics.....                                                                                                                                                                                                                                | 5 |
| <b>Results</b> .....                                                                                                                                                                                                                                             | 6 |
| Figure S1. (a) SEM images of and the synthesized scaffolds in the absence of crosslinker (PNIPAM <sub>2</sub> ), (b) TEM images of PNIPAM <sub>1</sub> .....                                                                                                     | 6 |
| Figure S2. SEM images of <b>1</b> after 3 days incubation in acidic medium. ....                                                                                                                                                                                 | 6 |
| Figure S3. (a) Characterization of the synthesized materials by XPS. Highly resolved B1s, C1s, N1s and O1s XPS spectra of <b>1</b> , <b>1</b> ⊃PNIPAM and PNIPAM <sub>1</sub> . (b) Elemental concentration determined from the XPS spectra for each sample..... | 8 |
| Table S1. Composition of <b>1</b> , <b>1</b> ⊃PNIPAM and PNIPAM <sub>1</sub> based on EDX .....                                                                                                                                                                  | 8 |
| Figure S4. SEM images of PNIPAM <sub>1</sub> at 30 °C (left) and 39 °C (right).....                                                                                                                                                                              | 9 |
| Figure S5. Changing the morphology of PNIPAM <sub>2</sub> from spindle-like microstructures to sunflower structures and globular networks, respectively, with increasing temperature from 30°C to 39°C..                                                         | 9 |

|                                                                                                                                                                                                                                                                 |           |
|-----------------------------------------------------------------------------------------------------------------------------------------------------------------------------------------------------------------------------------------------------------------|-----------|
| Study of the kinetic of absorption of dyes by PNIPAM <sub>1</sub> -sponge.....                                                                                                                                                                                  | 10        |
| Table S2. Kinetic parameters of adsorption of dyes by PNIPAM <sub>1</sub> -sponge.....                                                                                                                                                                          | 10        |
| Langmuir and Freundlich isothermse .....                                                                                                                                                                                                                        | 11        |
| Table S3. Different parameters for Langmuir and Freundlich isotherms for the absorption of MB, RhB and FL by PNIPAM <sub>1</sub> -sponge .....                                                                                                                  | 11        |
| Table S4. R <sub>L</sub> value for the adsorption of different concentrations of MB, RhB and FL by PNIPAM <sub>1</sub> -sponge .....                                                                                                                            | 11        |
| Table S5. Different parameters including removal efficiency, adsorption capacity and surface adsorption equilibrium constant for the adsorption of MB, RhB and FL by PNIPAM <sub>1</sub> -sponge at 25 °C and 40 °C.....                                        | 12        |
| Thermodynamic parameter.....                                                                                                                                                                                                                                    | 12        |
| Figure S5. ln K <sub>ad</sub> versus 1/T for MB (a), RhB (b) and FL (c) at different temprature.....                                                                                                                                                            | 13        |
| Table S6. Thermodynamic parameters for the adsorption of MB, RhB and FL by PNIPAM <sub>1</sub> -sponge.....                                                                                                                                                     | 13        |
| <b>Table S7. parameters including adsorption capacity and surface adsorption equilibrium constant for the adsorption of MB, RhB and FL by PNIPAM<sub>1</sub>-sponge were incubated with dye solutions (5 ml, 50 ppm) for 24 hours without shaking at 25 °C.</b> |           |
| <b>References.....</b>                                                                                                                                                                                                                                          | <b>14</b> |

## Experimental

### Materials and methods

1,4-benzenediboronic acid (96%), 2,3,6,7,10,11-hexahydroxytriphenylene (95%), N-isopropylacrylamide (97%), N, N'-methylenebis(acrylamide),  $\alpha$ ,  $\alpha'$ -azobisisobutyronitrile, 1,4-dioxane (99.8%), mesitylene (98%), acetonitrile, tetrahydrofuran, toluene, methanol, acetone, hydrochloric acid were purchased from Merck and Sigma-Aldrich and used directly without further purification. The dialysis bag (Biotech Cellulose Ester) with (MWCO: 2 kDa and 14 kDa were purchased from Biotech Cellulose Ester Company) and used for purification of polymer. Polyurethane foam was purchased from Chemical plant in Alborz Industrial City, Iran.

Infrared spectra (FT-IR) were recorded in the solid-state using potassium bromide tablet preparation and Shimadzu-8500 S infrared spectrometer. TGA thermograms were recorded by a STA 409 apparatus (Linseis) in a temperature range of 30-800 °C with a heating rate of 10 °C/min under nitrogen gas. Elemental analysis was performed using ELEMENTAR device with detector columns for carbon, nitrogen, hydrogen and sulfur. Morphology of materials were investigated using scanning electron microscope (SEM) model LEO 440i under vacuum and at 10 Kv voltage. The device was equipped with an energy dispersive X-ray (EDX) microanalysis system that was capable of identifying the number of corresponding atomic elements in the compounds. Samples were dispersed in water and dropped on a silica holder. Then water was evaporated and samples were coated by a thin layer of gold. The X-ray diffraction (XRD) spectrum of compounds was recorded using a Halland Philips Xpert device (Cuk, radiation,  $\lambda=0.154056$  nm) with a scanning speed of 2°/min and in the range of  $2\theta = 80 - 10$ .

Transmission electron microscopy (TEM) images were recorded as below:

Carbon-coated collodium film covered copper grids (400 mesh) were hydrophilized by a 60 s glow discharging at 8 W in a BALTEC MED 020 device (Leica Microsystems, Wetzlar, Germany). Then 5  $\mu$ l of the materials dispersion in water (0,01 mg/ml) was absorbed onto the hydrophilized grids. The supernatant fluid was removed by blotting with a filter paper and sample was allowed to dry in air. A standard holder was used to transfer the dried samples into a FEI Talos L120C transmission electron microscope (Thermo Fisher Scientific Inc., Waltham, Massachusetts, USA) equipped with a tungsten cathode. Images were taken with a 4k  $\times$  4k Ceta CMOS camera at a primary magnification of 36.000 x using an accelerating voltage of 120 kV.

X-ray photoelectron spectroscopy (XPS) was performed in an ultrahigh vacuum chamber (base pressure  $5.10 \cdot 10^{-10}$  mbar) using a JEOL JPS-9030 set-up comprising a photoelectron spectrometer hemispherical energy analyzer and a monochromatic Al  $K\alpha$  ( $h\nu = 1486.6$  eV) X-ray source. The XPS measurements were performed with an energy resolution of ca. 0.9 eV as determined on a polycrystalline Ag 3d core level. During the XPS measurements, strong charging of the sample was noticed. For correcting this charging issue, the XPS spectra were rigidly shifted to lower binding energy so that the C 1s peak is positioned at 284.5 eV, a typical value for C-C bonds.<sup>1</sup>

**Pseudo second order kinetics:**

Pseudo-second order kinetics were investigated according to equation (4). The  $t/q_t$  diagram was drawn in terms of  $t$  for different concentrations of methylene blue, rhodamine B and fluorescein. Afterwards, the value of the correlation coefficient and the second-order pseudo-rate constants were calculated. Results are shown in the table S2.<sup>2</sup>

## Results

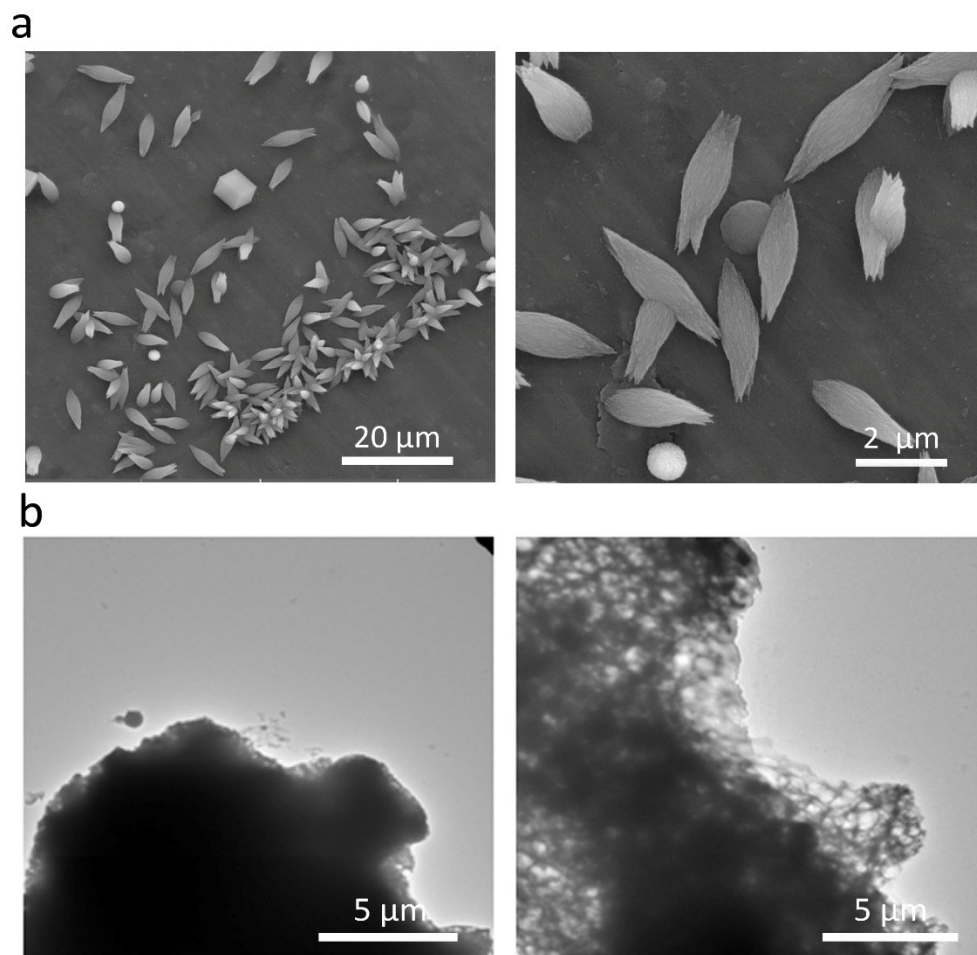

**Figure S1. (a) SEM images of PNIPAM<sub>2</sub>. (b) TEM images of PNIPAM<sub>1</sub>.**

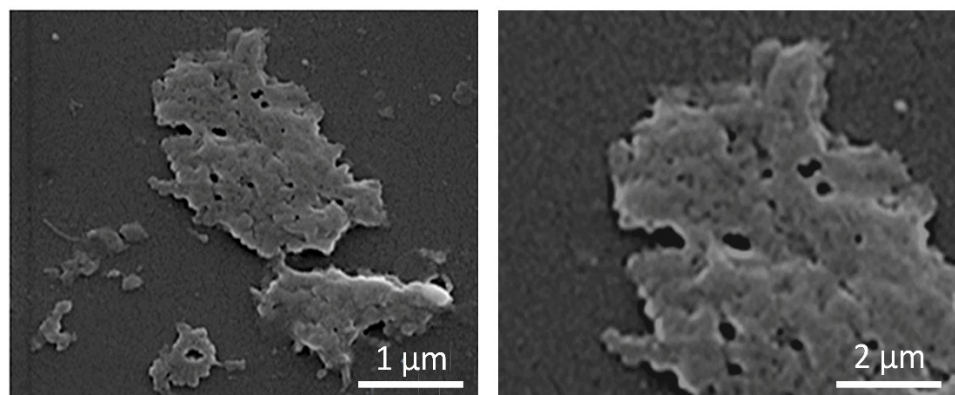

**Figure S2. SEM images of 1 after 3 days incubation in acidic medium.**

X-ray photoelectron spectroscopy (XPS) of **1**, **1**⊃PNIPAM and PNIPAM<sub>1</sub> were recorded (Figure S3a). Sample charging was observed during the measurements due to low conductivity of the materials, which was partly corrected by applying an energy shift in order to position the main C 1s peak at 284.5 eV. However, because of sample inhomogeneity, differential charging likely occurred, yielding additional artificial components in the XPS peaks, such as an unphysical C1s component at 281.5 eV for **1**⊃PNIPAM. Therefore, we stress that a precise assignment of the XPS results remains relatively involved but relevant aspects such as sample composition can still be discussed. XPS revealed that COF template was composed of carbon, oxygen and boron. The main peak component at 284.5 eV with a shoulder at 286.1 eV in the high resolution C1s spectrum were corresponding to the C=C and C-O bonds in the backbone of **1** (Figure S3a), respectively. For **1**⊃PNIPAM, an additional lower energy C1s component is observed, which is thought to be an artifact resulting from the charging correction procedure as differential charging occurs. The other two components are attributed to stem both from the COF and PNIPAM. For PNIPAM<sub>1</sub>, C-C bond is observed at 284.5 eV and C=O / C-N bonds at 287.4 eV. N1s is only observed for **1**⊃PNIPAM and PNIPAM<sub>1</sub> at 399.2 eV and is readily absent for the COF, showing the inclusion of NIPAM in the COF structure. Boron is observed for **1** and **1**⊃PNIPAM, as expected. The double B 1s component for **1**⊃PNIPAM may be the result of an artifact of the charging correction procedure as also observed for the C1s of the same sample. Importantly, no B1s signal is detected in the PNIPAM<sub>1</sub> spectrum, which demonstrates the efficient removal of the COF by hydrolysis. The stoichiometries for the three samples are reported in Figure S3b and summarized in table S1.

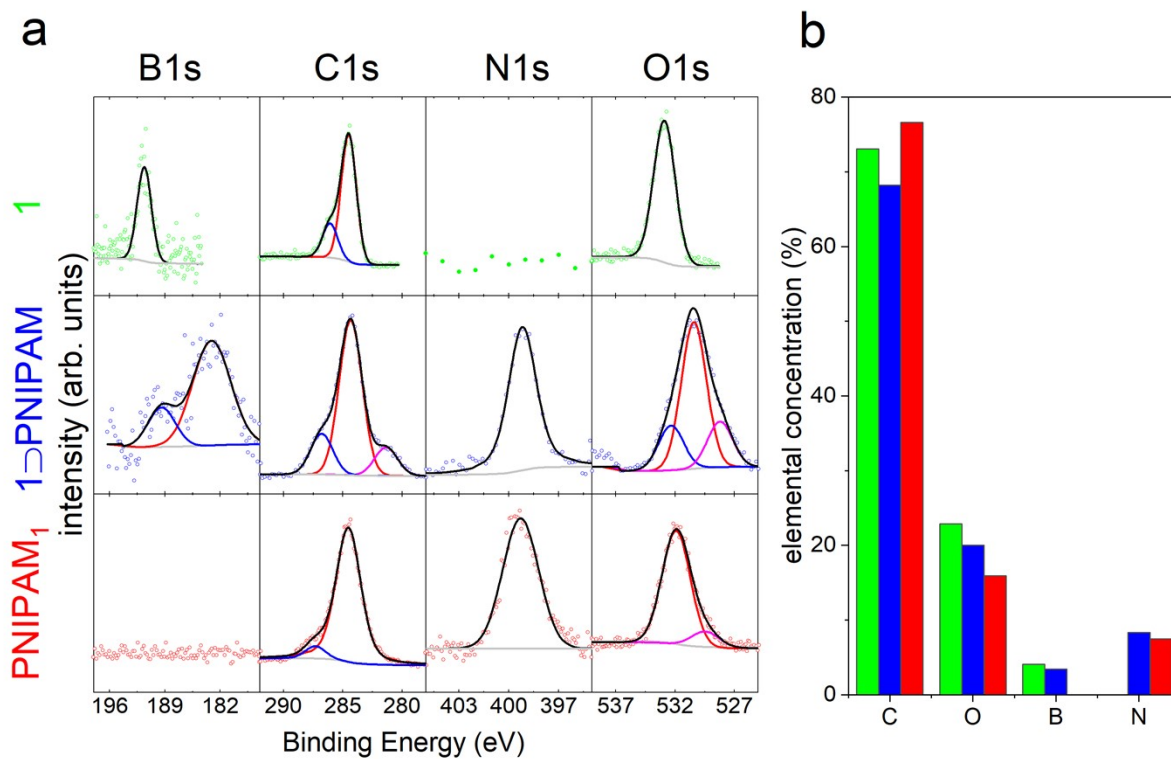

**Figure S3.** (a) Characterization of the synthesized materials by XPS. Highly resolved B1s, C1s, N1s and O1s XPS spectra of **1**, **1⊃PNIPAM** and **PNIPAM<sub>1</sub>**. (b) Elemental concentration determined from the XPS spectra for each sample.

**Table S1.** Composition of **1**, **1⊃PNIPAM** and **PNIPAM<sub>1</sub>** based on EDX.

| Element                   | C %  | O %  | N % | B % |
|---------------------------|------|------|-----|-----|
| <b>1</b>                  | 73.1 | 22.9 | -   | 4.0 |
| <b>1⊃PNIPAM</b>           | 68.2 | 20.0 | 8.4 | 3.4 |
| <b>PNIPAM<sub>1</sub></b> | 77.6 | 16.0 | 7.4 | -   |

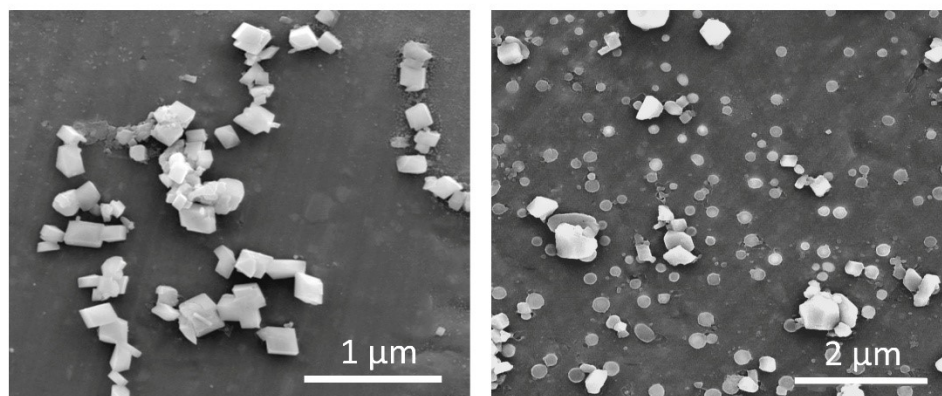

**Figure S4.** SEM images of PNIPAM<sub>1</sub> at 30 °C (left) and 39 °C (right).

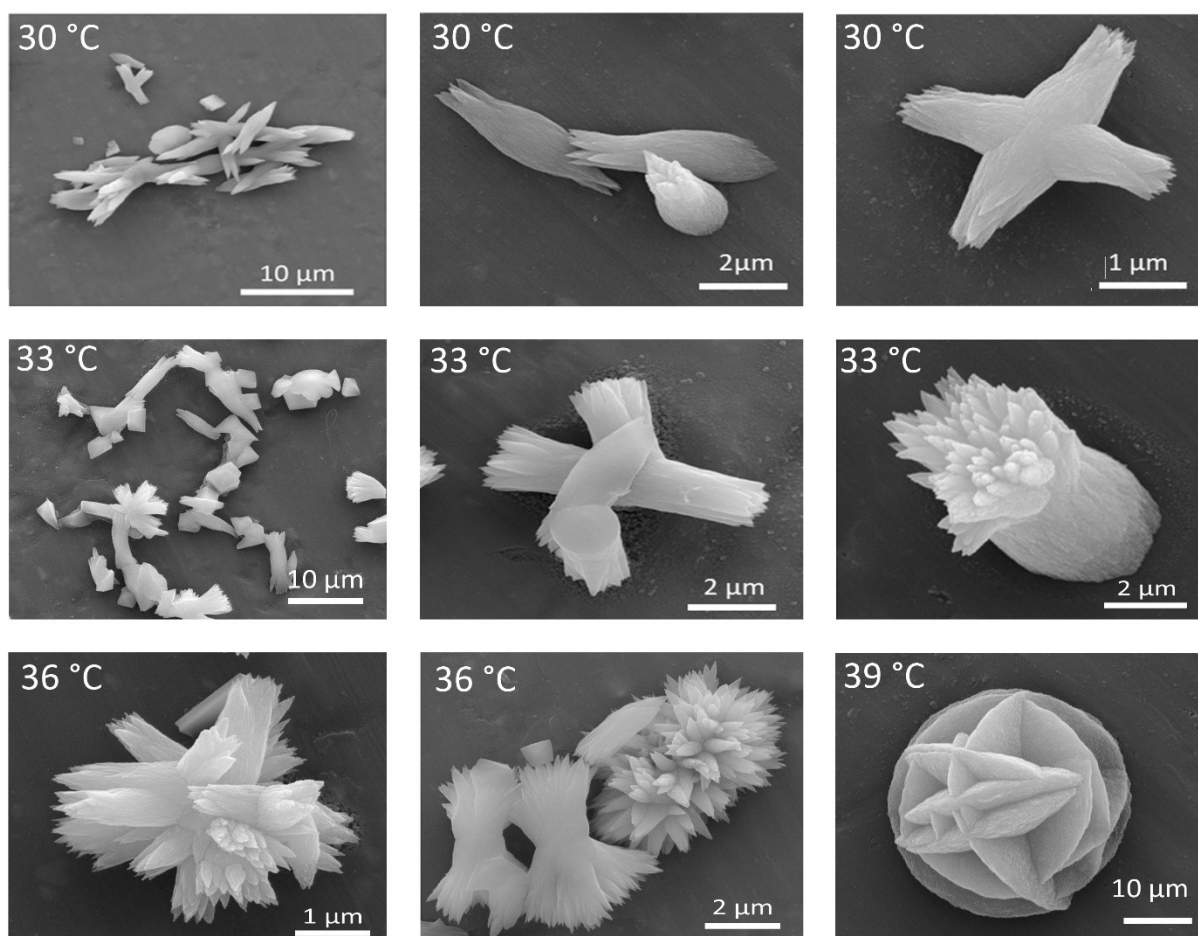

**Figure S5.** Changing the morphology of PNIPAM<sub>2</sub> from spindle-like microstructures to sunflower structures and globular networks, respectively, with increasing temperature from 30 °C to 39 °C.



### Study of the kinetic of absorption of dyes by PNIPAM<sub>1</sub>-sponge

In order to study the kinetic of absorption of dyes by PNIPAM<sub>1</sub>-sponge, the absorption capacity  $q_t$  (mg.g<sup>-1</sup>) and percentage of dye removal (%)R by the adsorbent at different time frames were calculated using equations (1) and (2), respectively:<sup>3</sup>

$$q_t = (C_0 - C_t) V/m \quad (1)$$

$$R\% = (C_0 - C_t)/C_0 \times 100 \quad (2)$$

where  $C_0$  and  $C_t$  were the initial concentration (mg.L<sup>-1</sup>) and concentration of dye (mg/l) at time  $t$ ,  $V$  was the volume of the solution (L), and  $m$  was the mass of the adsorbent (g).

In order to understand the adsorption mechanism of dye, adsorption rate constants of pseudo-first and second order kinetic models for each dye were studied using equations (3) and (4) (Figure 5).

$$\ln(q_e - q_t) = \ln q_e - k_1 t \quad (3)$$

$$t/q_t = 1/(k_2 q_e^2) + t/q_e \quad (4)$$

$K_1$  and  $K_2$  were the rate constants of the pseudo-first-order kinetic model (min<sup>-1</sup>) and the pseudo-second-order kinetic model (g.mg<sup>-1</sup>.min<sup>-1</sup>) respectively, and  $t$  was absorption time (min). The values of the kinetic parameters are presented in table S2 and figure S6.

**Table S2.** Kinetic parameters of adsorption of different dyes by PNIPAM<sub>1</sub>-sponge.

| Adsorbent | C(mg/l) | First order kinetic |         |        | Second order kinetic |         |        |
|-----------|---------|---------------------|---------|--------|----------------------|---------|--------|
|           |         | $K_1$               | $q_e$   | $R^2$  | $K_2$                | $q_e$   | $R^2$  |
| MB        | 5       | 0.0032              | 6.7593  | 0.9149 | 0.0010               | 7.2886  | 0.9121 |
|           | 10      | 0.0030              | 5.8993  | 0.9353 | 0.0006               | 9.7656  | 0.7926 |
|           | 20      | 0.0007              | 4.5405  | 0.4664 | 0.0016               | 8.0064  | 0.9739 |
| Rh B      | 5       | 0.0041              | 2.0221  | 0.5935 | 0.0100               | 9.9404  | 0.9999 |
|           | 10      | 0.0037              | 1.0085  | 0.9591 | 0.0009               | 17.6056 | 0.9976 |
|           | 15      | 0.0021              | 5.4313  | 0.4069 | 0.6200               | 1.6129  | 0.9997 |
| FL        | 5       | 0.0028              | 2.0068  | 0.4003 | 0.0014               | 7.1633  | 0.8040 |
|           | 10      | 0.0147              | 5671.53 | 0.2687 | 0.0025               | 12.8700 | 0.9951 |
|           | 15      | 0.0085              | 6.0618  | 0.0085 | 0.0049               | 20.5761 | 0.9998 |

### Langmuir and Freundlich isotherms

Langmuir (5) and Freundlich (6) isotherms were also investigated to gain more information about kinetic of dye adsorption.

$$C_e/q_e = 1/K_L q_m + C_e/q_m \quad (5)$$

$$\ln q_e = \ln K_f + 1/n \ln C_e \quad (6)$$

where,  $Q_m$  was maximum adsorption capacity ( $\text{mg. g}^{-1}$ ) and  $K_F$  and  $K_L$  were Freundlich and Langmuir constants, respectively.

**Table S3.** Different parameters for Langmuir and Freundlich isotherms for the absorption of MB, RhB and FL by PNIPAM<sub>1</sub>-sponge.

| Adsorbent  | Langmuir Isotherm |        |        | Freundlich Isotherm |        |        |        |
|------------|-------------------|--------|--------|---------------------|--------|--------|--------|
|            | $q_{\max}$        | $k_l$  | $R^2$  | $k_f$               | $1/n$  | $n$    | $R^2$  |
| <b>MB</b>  | 3.6271            | 0.1936 | 0.9693 | 1.1105              | 0.3267 | 3.0609 | 0.9908 |
| <b>RhB</b> | 30.215            | 0.1597 | 1.0000 | 4.6440              | 0.6555 | 1.5260 | 0.9969 |
| <b>FL</b>  | 15.1515           | 0.1909 | 0.9808 | 1.1200              | 1.0830 | 0.9234 | 0.9805 |

**Table S4.**  $R_L$  value for the adsorption of different concentrations of MB, RhB and FL by PNIPAM<sub>1</sub>-sponge.

| Adsorbent  | $C(\text{mg.L}^{-1})$ | $R_L$  |
|------------|-----------------------|--------|
| <b>MB</b>  | 5                     | 0.5081 |
|            | 10                    | 0.3406 |
|            | 20                    | 0.2052 |
| <b>RhB</b> | 5                     | 0.5561 |
|            | 10                    | 0.3851 |
|            | 15                    | 0.2946 |
| <b>FL</b>  | 5                     | 0.5117 |
|            | 10                    | 0.3438 |
|            | 15                    | 0.2589 |

**Table S5.** Different parameters including removal efficiency, adsorption capacity and surface adsorption equilibrium constant for the adsorption of MB, RhB and FL by PNIPAM<sub>1</sub>-sponge at 25 °C and 40 °C.

| Adsorbent | T(°K) | $k_{ad}$ | $\ln k_{ad}$ | %R      | $q_t$ (mg.g <sup>-1</sup> ) |
|-----------|-------|----------|--------------|---------|-----------------------------|
| MB        | 323   | 0.8030   | -0.2194      | 44.5382 | 8.0037                      |
|           | 328   | 0.8479   | -0.1650      | 45.8848 | 8.2457                      |
|           | 333   | 0.9134   | -0.0906      | 47.7363 | 8.5784                      |
|           | 338   | 0.9543   | -0.0468      | 48.8304 | 8.7750                      |
|           | 343   | 0.9575   | -0.0434      | 48.9145 | 8.7902                      |
| Rh B      | 323   | 35.4230  | 3.5674       | 97.2545 | 16.9161                     |
|           | 328   | 34.2995  | 3.5351       | 97.1671 | 16.9010                     |
|           | 333   | 10.3194  | 2.3340       | 91.1656 | 15.8571                     |
|           | 338   | 4.9276   | 1.5949       | 83.1298 | 14.4593                     |
|           | 343   | 3.4716   | 1.2446       | 77.6369 | 13.5039                     |
| FL        | 323   | 21.4830  | 3.0673       | 95.5522 | 14.4757                     |
|           | 328   | 17.0705  | 2.8374       | 94.4661 | 14.3111                     |
|           | 333   | 10.5182  | 2.3531       | 91.3181 | 13.8342                     |
|           | 338   | 6.2369   | 1.8305       | 86.1819 | 13.0561                     |
|           | 343   | 5.3936   | 1.6852       | 84.3594 | 12.7800                     |

### Thermodynamic parameters

The values of equilibrium concentration ( $C_e$ ) were obtained using the absorption value at different temperatures by equation 8.

$$K_{ad} = C_0 - C_e / C_e \quad (8)$$

Diagram of  $\ln K_{ad}$  versus  $1/T$ , provide parameters including  $\Delta S/R$  and  $\Delta H/R$ . Considering  $R=0.008314$  (kj.mol<sup>-1</sup>.k<sup>-1</sup>), the values of  $\Delta H$  (kj/mol) and  $\Delta S$  (kj.mol<sup>-1</sup>.k<sup>-1</sup>) for surface adsorption of MB, RhB and FL were calculated by equation 9.

$$\ln k_{ad} = \Delta S/R - \Delta H/RT \quad (9)$$

Changes in Gibbs free energy ( $\Delta G$ ) for adsorption of MB, RhB and FL at different temperatures, were calculated using equation 10. The results are summarized in the table S6.

$$\Delta G^\circ = \Delta H^\circ - T\Delta S^\circ \quad (10)$$

A negative  $\Delta G$  indicates that the desired reaction is spontaneous. Positive  $\Delta S$  indicates an increase in irregularity at the solid-liquid interface during the process of surface adsorption on the

adsorbent. Positive  $\Delta H$  indicated that adsorption is endothermic. Therefore, it is expected that the value of  $K_{ad}$  increases with increased temperature. Results in table S5 and S6 confirm this issue.

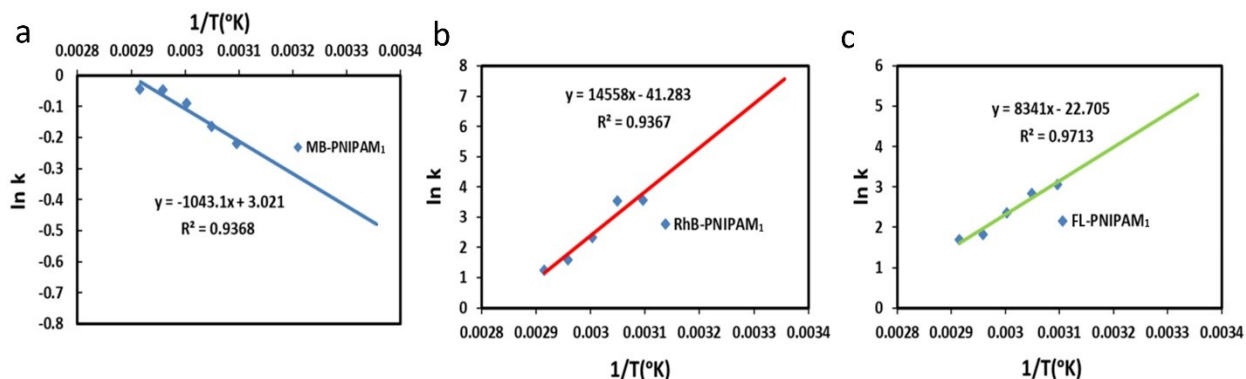

**Figure S6.**  $\ln K_{ad}$  versus  $1/T$  for MB (a), RhB (b) and FL (c) at different temperatures.

**Table S6.** Thermodynamic parameters for the adsorption of MB, RhB and FL by PNIPAM<sub>1</sub>-sponge.

| Adsorbent | C(mg.L <sup>-1</sup> ) | $\Delta H^\circ$ (kJ.mol <sup>-1</sup> ) | $\Delta S^\circ$ (j.mol <sup>-1</sup> .k <sup>-1</sup> ) | T(°k) | $\Delta G^\circ$ (kJ.mol <sup>-1</sup> ) | R <sup>2</sup> |
|-----------|------------------------|------------------------------------------|----------------------------------------------------------|-------|------------------------------------------|----------------|
| MB        | 10                     | -8.6723                                  | +0.0251                                                  | 298   | -16.1521                                 | 0.9368         |
|           |                        |                                          |                                                          | 323   | -16.7796                                 |                |
|           |                        |                                          |                                                          | 328   | -16.9051                                 |                |
|           |                        |                                          |                                                          | 333   | -17.0306                                 |                |
|           |                        |                                          |                                                          | 338   | -17.1561                                 |                |
|           |                        |                                          |                                                          | 343   | -17.2816                                 |                |
| Rh B      | 10                     | -121.0352                                | -0.3432                                                  | 298   | -18.7616                                 | 0.9367         |
|           |                        |                                          |                                                          | 323   | -10.1816                                 |                |
|           |                        |                                          |                                                          | 328   | -8.4656                                  |                |
|           |                        |                                          |                                                          | 333   | -6.7496                                  |                |
|           |                        |                                          |                                                          | 338   | -5.0336                                  |                |
|           |                        |                                          |                                                          | 343   | -3.3176                                  |                |
| FL        | 10                     | -69.3471                                 | -0.1888                                                  | 298   | -13.0847                                 | 0.9713         |
|           |                        |                                          |                                                          | 323   | -8.3647                                  |                |
|           |                        |                                          |                                                          | 328   | -7.4207                                  |                |
|           |                        |                                          |                                                          | 333   | -6.4767                                  |                |
|           |                        |                                          |                                                          | 338   | -5.5327                                  |                |
|           |                        |                                          |                                                          | 343   | -4.5887                                  |                |

**Table S7.** Adsorption capacity of PNIPAM<sub>1</sub>-sponge to remove MB, RhB and FL from different samples of tap water. PNIPAM<sub>1</sub>-sponge was incubated with dye solutions (5 ml, 50 ppm) for 24 hours without shaking at 25 °C and then the adsorption of dye was investigated using UV spectroscopy.

| <b>Absorbent</b>                             | <b>Dyes (50 ppm)</b> | <b>Maximum dye adsorption (mg.g<sup>-1</sup>)</b> |
|----------------------------------------------|----------------------|---------------------------------------------------|
| H <sub>2</sub> O-Keeyow Lake Khorramabad     | RhB                  | 87.42                                             |
|                                              | FL                   | 75.05                                             |
|                                              | MB                   | 34.63                                             |
| H <sub>2</sub> O -Kakareza River Khorramabad | RhB                  | 85.94                                             |
|                                              | FL                   | 73.24                                             |
|                                              | MB                   | 35.39                                             |
| H <sub>2</sub> O- Drinking water Khorramabad | RhB                  | 89.51                                             |
|                                              | FL                   | 63.93                                             |
|                                              | MB                   | 35.50                                             |
| D <sub>2</sub> O                             | RhB                  | 245                                               |
|                                              | FL                   | 231                                               |
|                                              | MB                   | 98                                                |

## References

- (1) Noda, Y.; Merschjann, C.; Tarábek, J.; Amsalem, P.; Koch, N.; Bojdys, M. J., Directional Charge Transport in Layered Two-Dimensional Triazine-Based Graphitic Carbon Nitride. *Angew. Chem. Int. Ed.* **2019**, *58* (28), 9394-9398.
- (2) Li, Y.; Yang, C.-X.; Qian, H.-L.; Zhao, X.; Yan, X.-P., Carboxyl-functionalized covalent organic frameworks for the adsorption and removal of triphenylmethane dyes. *ACS Appl. Nano Mater.* **2019**, *2* (11), 7290-7298.
- (3) Ghosh, I.; Kar, S.; Chatterjee, T.; Bar, N.; Das, S. K., Removal of methylene blue from aqueous solution using Lathyrus sativus husk: adsorption study, MPR and ANN modelling. *PSEP* **2021**, *149*, 345-361.
